# Supplementary material for: Bacterial detection and identification from human synovial fluids on an integrated microfluidic system
Source: Royal Society of Chemistry journal article supplement (doi:10.1039/c8an01764f), 2018-11-16
Supplement: c8an01764f1.pdf [file c8an01764f1.pdf]

Supplementary Information

Bacterial Detection and Identification from Human Synovial  
Fluids on an Integrated Microfluidic System

*Ting-Hang Liu<sup>1</sup>, Shu-Shen Cheng<sup>2</sup>, Huey-Ling You<sup>2</sup>, Mel S. Lee<sup>3\*\*</sup>, and Gwo-Bin*

*Lee<sup>1, 4, 5\*</sup>*

*<sup>1</sup>Department of Power Mechanical Engineering, National Tsing Hua University,  
Hsinchu, Taiwan*

*<sup>2</sup>Department of Laboratory Medicine, Kaohsiung Chang Gung Memorial Hospital,  
Kaohsiung, Taiwan*

*<sup>3</sup>Department of Orthopaedic Surgery, Kaohsiung Chang Gung Memorial Hospital,  
Kaohsiung, Taiwan*

*<sup>4</sup>Institute of Biomedical Engineering, National Tsing Hua University, Hsinchu,  
Taiwan*

*<sup>5</sup>Institute of NanoEngineering and Microsystems, National Tsing Hua University,  
Hsinchu, Taiwan*

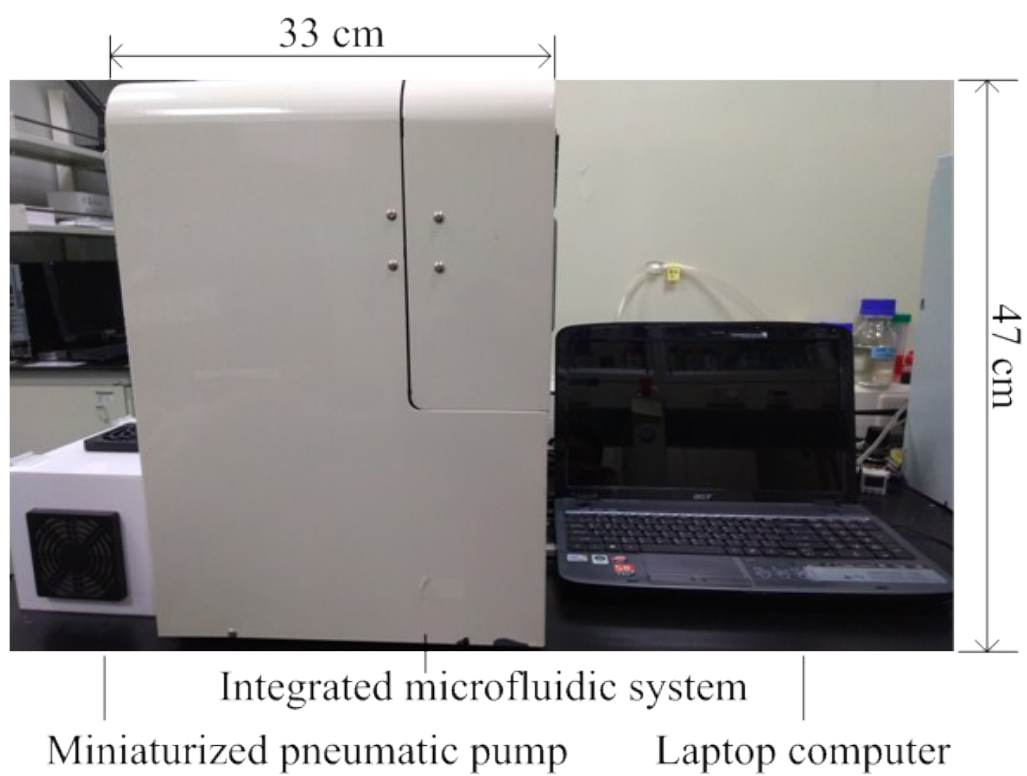

**Supplementary Fig. 1.** The experimental setup of the integrated microfluidic system
